# Supplementary material for: Combining photo-CIDNP and long-lived spin states enables high-contrast detection of weak protein–ligand interactions
Source: Royal Society of Chemistry journal article supplement (doi:10.1039/d6cp00658b), 2026-05-12
Supplement: d6cp00658b1.pdf [file d6cp00658b1.pdf]

## SI Information

# Combining Photo-CIDNP and Long-Lived Spin States Enables High-Contrast Detection of Weak Protein- Ligand Interactions

Matthias Bütikofer<sup>1,3</sup>, Anna Sonnefeld<sup>2</sup>, Gabriela R. Stadler<sup>1</sup>, Félix Torres<sup>3</sup>, Geoffrey Bodenhausen<sup>2</sup>, Kirill F. Sheberstov<sup>2\*</sup>, Roland Riek<sup>1\*\*</sup>

Correspondence to:

\* kirill.sheberstov@ens.psl.eu

\*\* roland.riek@phys.chem.ethz.ch

To be submitted to PCCP

### Affiliations

<sup>1</sup>Institute of Molecular Physical Science, ETH Zürich, Vladimir-Prelog-Weg 2, CH-8093 Zürich, Switzerland.

<sup>2</sup>Chimie Physique et Chimie du Vivant (CPCV, UMR 8228), Department of Chemistry, Ecole Normale Supérieure, PSL University, Sorbonne University, CNRS, Paris, 75005, France.

<sup>3</sup>NexMR AG, Wiesenstrasse 10A, 8952 Schlieren.

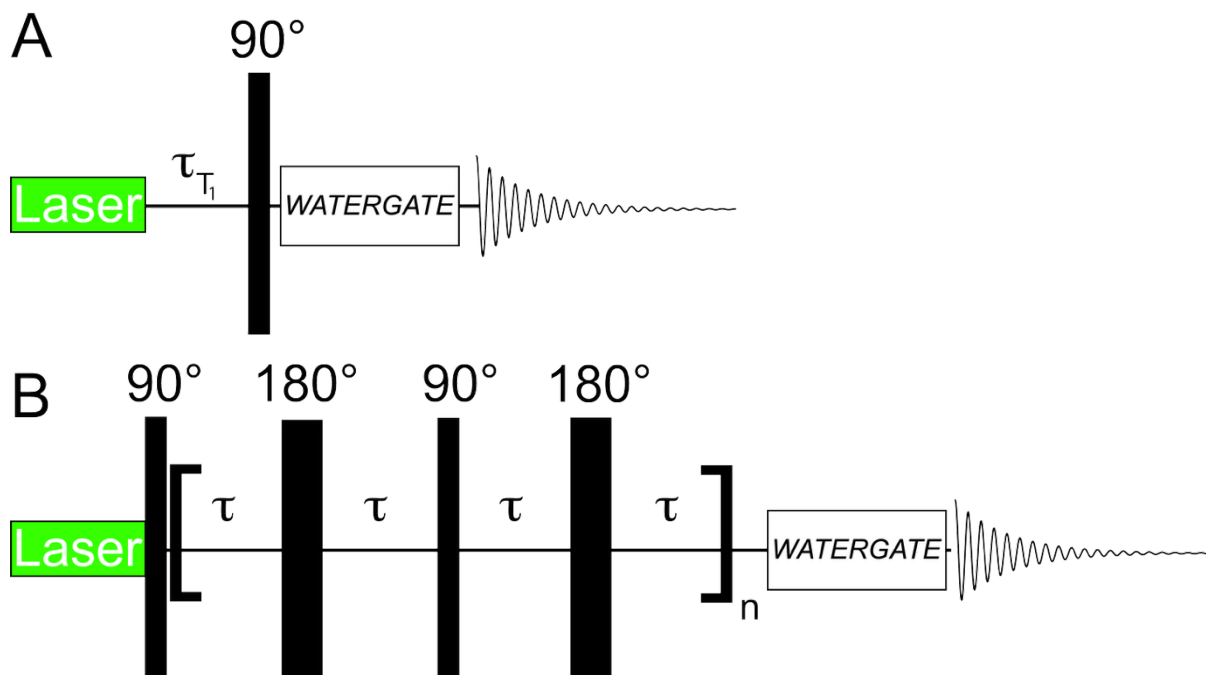

**Figure S1. Pulse sequences used for CIDNP-based experiments.** (A)  $^1\text{H}$  CIDNP experiment employing a variable delay after laser irradiation to observe the  $T_1$  relaxation of the photo-CIDNP signal. (B) CIDNP-PEARLScreen pulse sequence utilizing so-called perfect echoes enhanced by photo-CIDNP hyperpolarization and WATERGATE for solvent suppression.

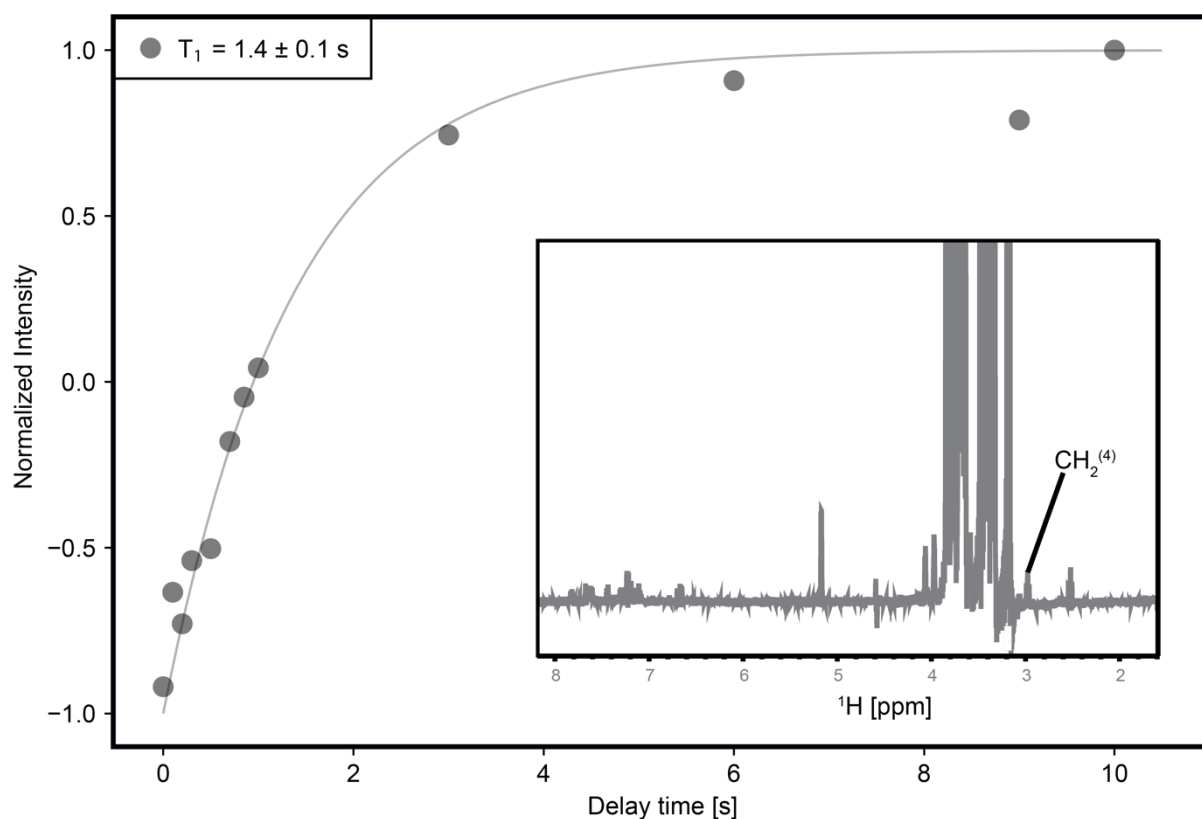

**Figure S2. Conventional  $T_1$  Inversion recovery of 50  $\mu\text{M}$  IPA.** The  $T_1$  Inversion recovery of 50  $\mu\text{M}$  was measured using thermal polarization. The spectrum shows that IPA is fully relaxed 10 s after inversion. The measurements were conducted with 8 scans.

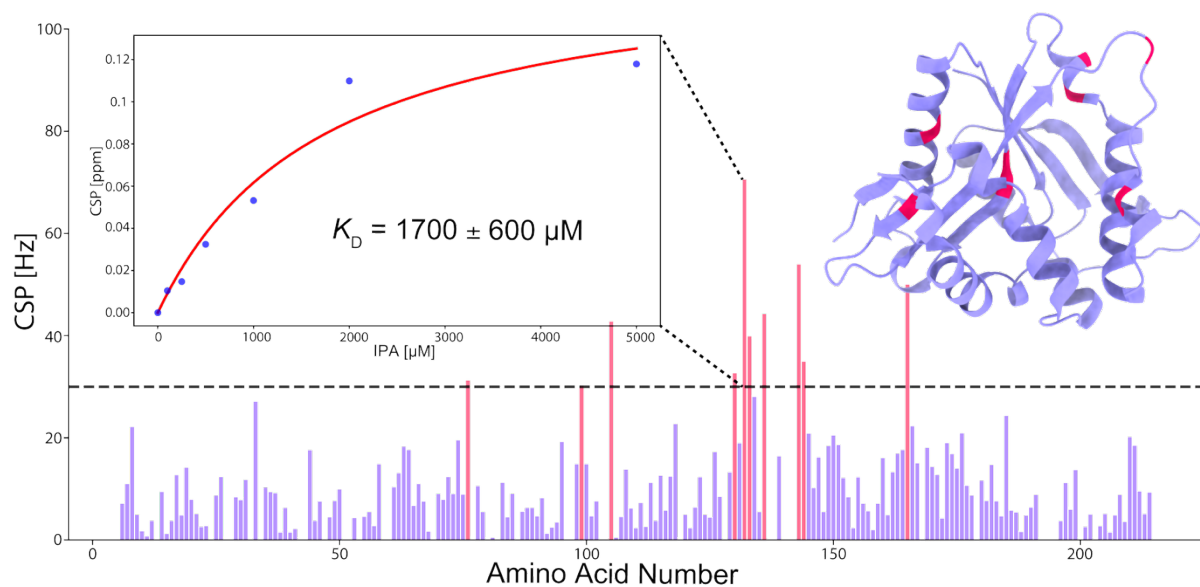

**Figure S3. Chemical shift perturbation analysis of the protein AANAT upon IPA binding.**  $^{15}\text{N}$ ,  $^1\text{H}$  chemical shift perturbation (CSP) map of 100  $\mu\text{M}$  AANAT upon binding to 5 mM IPA. Assignments were taken from BMRB entry 50445. Residues exhibiting CSPs greater than 35 Hz are highlighted in red on the PDB structure 3v8i (apo AANAT). Insert:  $^{15}\text{N}$ ,  $^1\text{H}$  HSQC titration curve with corresponding  $K_D = 1700 \mu\text{M}$  for residue V132 which has the largest shift.
